# Supplementary material for: Unexpected complexity of the Aquaporin gene family in the moss Physcomitrella patens
Source: PubMed Central journal article supplement (PMC2386804; doi:10.1186/1471-2229-8-45), 2008-04-22
Supplement: 1471-2229-8-45-S1.pdf [file 1471-2229-8-45-S1.pdf]

|          |   |   |   |   |   |   |   |   |   |   |   |   |   |   |   |   |   |   |   |   |   |   |   |   |   |   |   |   |   |   |   |   |   |   |   |   |   |   |   |   |   |   |   |   |   |   |   |   |   |   |   |   |   |   |   |   |   |   |
|----------|---|---|---|---|---|---|---|---|---|---|---|---|---|---|---|---|---|---|---|---|---|---|---|---|---|---|---|---|---|---|---|---|---|---|---|---|---|---|---|---|---|---|---|---|---|---|---|---|---|---|---|---|---|---|---|---|---|---|
| AtPIP1.1 | R | Q | P | I | G | T | S | A | Q | - | - | - | - | S | D | K | D | Y | K | E | P | P | P | A | P | L | F | F | E | P | G | E | L | S | S | W | S | F | W | R | A | G | I | A | E | F | I | A | T | F | L | F | L | Y | I |   |   |   |
| AtPIP1.2 | R | Q | P | I | G | T | S | A | Q | - | - | - | - | S | D | K | D | Y | K | E | P | P | P | A | P | L | F | F | E | P | G | E | L | S | S | W | S | F | W | R | A | G | I | A | E | F | I | A | T | F | L | F | L | Y | I |   |   |   |
| AtPIP1.3 | R | Q | P | I | G | T | S | A | Q | - | - | - | - | T | D | K | D | Y | K | E | P | P | P | A | P | F | F | E | P | G | E | L | S | S | W | S | F | Y | R | A | G | I | A | E | F | I | A | T | F | L | F | L | Y | I |   |   |   |   |
| AtPIP1.4 | R | Q | P | I | G | T | S | A | Q | - | - | - | S | T | D | K | D | Y | K | E | P | P | P | A | P | L | F | F | E | P | G | E | L | S | S | W | S | F | Y | R | A | G | I | A | E | F | I | A | T | F | L | F | L | Y | I |   |   |   |
| AtPIP1.5 | R | Q | P | I | G | T | A | A | Q | - | - | - | T | E | S | K | D | Y | K | E | P | P | P | A | P | F | F | E | P | G | E | L | K | S | W | S | F | Y | R | A | G | I | A | E | F | I | A | T | F | L | F | L | Y | V |   |   |   |   |
| ZmPIP1.1 | R | H | A | I | G | T | A | A | Q | G | T | - | - | - | D | D | K | D | Y | K | E | P | P | P | A | P | L | F | F | E | P | G | E | L | K | S | W | S | F | Y | R | P | G | I | A | E | F | V | A | T | F | L | F | L | Y | I |   |   |
| ZmPIP1.2 | R | Q | P | I | G | T | A | A | Q | G | A | A | - | - | D | D | K | D | Y | K | E | P | P | P | A | P | L | F | F | E | P | G | E | L | K | S | W | S | F | Y | R | A | G | I | A | E | F | V | A | T | F | L | F | L | Y | I |   |   |
| ZmPIP1.3 | R | Q | P | I | G | T | A | A | Q | G | A | G | A | G | D | D | K | D | Y | K | E | P | P | P | A | P | L | F | F | E | P | G | E | L | K | S | W | S | F | Y | R | A | G | I | A | E | F | V | A | T | F | L | F | L | Y | I |   |   |
| ZmPIP1.4 | R | Q | P | I | G | T | A | A | Q | G | A | G | A | G | D | D | K | D | Y | K | E | P | P | P | A | P | L | F | F | E | P | G | E | L | K | S | W | S | F | Y | R | A | G | I | A | E | F | V | A | T | F | L | F | L | Y | I |   |   |
| ZmPIP1.5 | R | Q | P | I | G | T | A | A | Q | G | T | - | - | - | E | E | K | D | Y | K | E | P | P | P | A | P | L | F | E | A | E | E | L | T | S | W | S | F | Y | R | A | G | I | A | E | F | V | A | T | F | L | F | L | Y | I |   |   |   |
| ZmPIP1.6 | R | Q | P | I | G | T | A | A | D | - | - | - | - | D | L | G | R | D | Y | S | E | P | P | A | A | P | L | F | E | A | S | E | L | S | S | W | S | F | Y | R | A | G | I | A | E | F | V | A | T | F | L | F | L | Y | V |   |   |   |
| PpPIP1.1 | R | S | A | L | G | T | H | A | P | - | - | - | - | V | P | E | K | D | Y | T | E | P | S | V | T | P | F | F | D | G | S | E | F | R | R | W | S | F | W | R | A | G | I | A | E | F | I | A | T | L | L | F | L | Y | I |   |   |   |
| PpPIP1.2 | R | S | A | L | G | T | H | A | P | - | - | - | - | V | P | E | K | D | Y | R | E | P | S | V | T | P | F | F | D | G | G | E | L | R | L | W | S | F | W | R | A | G | I | A | E | F | F | A | T | L | L | F | L | Y | I |   |   |   |
| PpPIP1.3 | R | N | P | L | G | T | S | A | Q | - | - | - | - | T | R | E | K | D | Y | I | E | P | A | S | S | P | F | F | I | D | P | V | E | L | G | R | W | S | F | W | R | A | G | I | A | E | F | F | A | S | F | L | L | F | L | Y | I |   |
| AtPIP2.1 | - | - | - | - | - | - | - | - | - | - | - | - | - | F | Q | T | R | D | Y | Q | D | P | P | P | A | P | F | F | I | D | G | A | E | L | K | K | W | S | F | Y | R | A | V | I | A | E | F | V | A | T | L | L | F | L | Y | I |   |   |
| AtPIP2.2 | - | - | - | - | - | - | - | - | - | - | - | - | - | F | Q | T | R | D | Y | E | D | P | P | P | T | P | F | F | F | D | A | E | E | L | T | K | W | S | L | Y | R | A | V | I | A | E | F | V | A | T | L | L | F | L | Y | I |   |   |
| AtPIP2.3 | - | - | - | - | - | - | - | - | - | - | - | - | - | F | Q | T | R | D | Y | E | D | P | P | P | T | P | F | F | F | D | A | E | E | L | T | K | W | S | L | Y | R | A | V | I | A | E | F | V | A | T | L | L | F | L | Y | I |   |   |
| AtPIP2.4 | - | - | - | - | - | - | - | - | - | - | - | - | - | P | A | A | R | D | Y | K | D | P | P | P | A | P | F | F | F | D | M | E | E | L | R | K | W | P | L | Y | R | A | V | I | A | E | F | V | A | T | L | L | F | L | Y | V |   |   |
| AtPIP2.5 | - | - | - | - | - | - | - | - | - | - | - | - | - | F | S | G | K | D | Y | Q | D | P | P | P | E | P | L | F | D | A | T | E | L | G | K | W | S | F | Y | R | A | L | I | A | E | F | I | A | T | L | L | F | L | Y | V |   |   |   |
| AtPIP2.6 | - | - | - | - | - | - | - | - | - | - | - | - | - | L | S | G | K | D | Y | L | D | P | P | P | V | K | T | F | E | V | E | L | K | K | W | S | F | Y | R | A | V | I | A | E | F | I | A | T | L | L | F | L | Y | V |   |   |   |   |
| AtPIP2.7 | - | - | - | - | - | - | - | - | - | - | - | - | - | H | S | G | K | D | Y | V | D | P | P | P | A | P | L | L | L | D | M | G | E | L | K | K | W | S | F | Y | R | A | I | I | A | E | F | I | A | T | L | L | F | L | Y | V |   |   |
| AtPIP2.8 | - | - | - | - | - | - | - | - | - | - | - | - | - | H | G | K | D | Y | V | D | P | P | P | A | P | L | L | L | D | M | A | E | L | K | L | W | S | F | Y | R | A | I | I | A | E | F | I | A | T | L | L | F | L | Y | V |   |   |   |
| ZmPIP2.1 | - | - | - | - | - | - | - | - | - | - | - | - | E | F | A | A | K | D | Y | T | D | P | P | P | A | P | L | L | I | D | A | A | E | L | G | S | W | S | L | Y | R | A | V | I | A | E | F | I | A | T | L | L | F | L | Y | I |   |   |
| ZmPIP2.2 | - | - | - | - | - | - | - | - | - | - | - | - | E | F | A | A | K | D | Y | T | D | P | P | P | A | P | L | L | V | D | A | A | E | L | G | S | W | S | L | Y | R | A | V | I | A | E | F | I | A | T | L | L | F | L | Y | V |   |   |
| ZmPIP2.3 | - | - | - | - | - | - | - | - | - | - | - | - | E | F | S | A | K | D | Y | T | D | P | P | P | A | P | L | L | I | D | A | E | E | L | T | K | W | S | L | Y | R | A | V | I | A | E | F | I | A | T | L | L | F | L | Y | I |   |   |
| ZmPIP2.4 | - | - | - | - | - | - | - | - | - | - | - | - | E | F | S | A | K | D | Y | T | D | P | P | P | A | P | L | L | I | D | A | E | E | L | T | Q | W | S | L | Y | R | A | V | I | A | E | F | I | A | T | L | L | F | L | Y | I |   |   |
| ZmPIP2.5 | - | - | - | - | - | - | - | - | - | - | - | - | H | E | G | K | D | Y | S | D | P | P | P | A | P | L | V | D | A | E | E | L | T | K | W | S | L | Y | R | A | V | I | A | E | F | V | A | T | L | L | F | L | Y | I |   |   |   |   |
| ZmPIP2.6 | - | - | - | - | - | - | - | - | - | - | - | - | V | R | D | R | D | Y | A | D | P | P | P | A | P | L | L | I | D | I | D | E | L | G | K | W | S | L | Y | R | A | V | I | A | E | F | V | A | T | L | L | F | L | Y | I |   |   |   |
| ZmPIP2.7 | - | - | - | - | - | - | - | - | - | - | - | - | E | Y | S | A | K | D | Y | H | D | P | P | P | A | P | L | L | I | D | P | D | E | L | T | K | W | S | L | Y | R | A | A | I | A | E | F | I | A | T | L | L | F | L | Y | I |   |   |
| PpPIP2.1 | - | - | - | - | - | - | - | - | - | - | - | - | - | P | S | K | D | Y | S | D | P | P | P | A | P | L | L | I | D | A | A | E | F | G | R | W | S | F | Y | R | A | I | I | A | E | F | V | A | T | L | L | F | L | Y | I |   |   |   |
| PpPIP2.2 | - | - | - | - | - | - | - | - | - | - | - | - | - | P | S | K | D | Y | T | D | P | P | P | A | P | L | L | I | D | A | S | E | F | G | Q | W | S | F | Y | R | A | V | I | A | E | F | V | A | T | L | L | F | L | Y | I |   |   |   |
| PpPIP2.3 | - | - | - | - | - | - | - | - | - | - | - | - | - | P | S | K | D | Y | A | D | P | P | P | A | P | L | L | I | D | A | S | E | F | G | Q | W | S | F | Y | R | A | I | I | A | E | F | V | A | T | L | L | F | L | Y | I |   |   |   |
| PpPIP2.4 | - | - | - | - | - | - | - | - | - | - | - | - | - | K | F | R | S | K | D | Y | I | D | P | P | A | P | L | F | V | D | A | S | E | L | R | K | W | S | F | Y | R | A | I | I | A | E | F | I | S | T | L | L | F | L | Y | I |   |   |
| PpPIP3.1 | - | - | - | - | - | - | - | - | - | - | - | - | M | P | T | D | N | E | F | R | D | T | H | E | P | P | P | A | P | I | L | A | R | D | E | F | N | E | W | S | F | Y | R | A | I | I | A | E | F | I | A | T | L | L | F | L | Y | V |
| AtTIP1.1 | - | - | - | - | - | - | - | - | - | - | - | - | M | P | I | R | N | I | A | I | G | - | - | - | - | - | - | - | R | P | D | E | A | T | R | P | D | A | L | K | A | A | L | A | E | F | I | S | T | L | I | F | V | V | A |   |   |   |
| AtTIP1.2 | - | - | - | - | - | - | - | - | - | - | - | - | M | P | T | R | N | I | A | I | G | - | - | - | - | - | - | G | V | Q | E | E | V | Y | H | P | N | A | L | R | A | A | L | A | E | F | I | S | T | L | I | F | V | F | A |   |   |   |
| AtTIP1.3 | - | - | - | - | - | - | - | - | - | - | - | - | M | P | I | N | R | I | A | I | G | - | - | - | - | - | - | T | P | G | E | A | S | R | P | D | A | I | R | A | A | F | A | E | F | F | S | M | V | I | F | V | F | A |   |   |   |   |
| AtTIP2.1 | - | - | - | - | - | - | - | - | - | - | - | - | M | A | G | V | A | F | G | - | - | - | - | - | - | - | - | - | S | F | D | D | S | F | S | L | A | S | L | R | A | Y | L | A | E | F | I | S | T | L | L | F | V | F | A |   |   |   |
| AtTIP2.2 | - | - | - | - | - | - | - | - | - | - | - | - | M | V | K | I | E | I | G | - | - | - | - | - | - | - | - | - | S | V | G | D | S | F | S | V | A | S | L | K | A | Y | L | S | E | F | I | A | T | L | L | F | V | F | A |   |   |   |
| AtTIP2.3 | - | - | - | - | - | - | - | - | - | - | - | - | M | V | K | I | E | V | G | - | - | - | - | - | - | - | - | - | S | V | G | D | S | F | S | V | S | S | L | K | A | Y | L | S | E | F | I | A | T | L | L | F | V | F | A |   |   |   |
| AtTIP3.1 | - | - | - | - | - | - | - | - | - | - | - | - | M | A | T | S | A | R | R | A | Y | G | - | - | - | - | - | - | F | G | R | A | D | E | A | T | H | P | D | S | I | R | A | T | L | A | E | F | L | S | T | F | V | F | V | F | A |   |
| AtTIP3.2 | - | - | - | - | - | - | - | - | - | - | - | - | M | A | T | S | A | R | R | A | Y | G | - | - | - | - | - | - | F | G | R | A | D | E | A | T |   |   |   |   |   |   |   |   |   |   |   |   |   |   |   |   |   |   |   |   |   |   |



|          |   |   |   |   |   |   |   |   |   |   |   |   |   |   |   |   |   |   |   |   |   |   |   |   |   |   |   |   |   |   |   |   |   |   |   |   |   |   |   |   |   |   |   |   |   |   |   |   |   |   |   |   |   |   |   |   |
|----------|---|---|---|---|---|---|---|---|---|---|---|---|---|---|---|---|---|---|---|---|---|---|---|---|---|---|---|---|---|---|---|---|---|---|---|---|---|---|---|---|---|---|---|---|---|---|---|---|---|---|---|---|---|---|---|---|
| AtPIP1.1 | I | N | P | A | V | T | F | G | L | F | L | A | R | K | L | S | - | - | - | - | L | T | R | A | L | Y | Y | I | V | M | Q | C | L | G | A | I | C | G | A | G | V | V | K | G | F | Q | P | K | Q | Y | Q | A | - | - | - | - |
| AtPIP1.2 | I | N | P | A | V | T | F | G | L | F | L | A | R | K | L | S | - | - | - | - | L | T | R | A | V | Y | Y | I | V | M | Q | C | L | G | A | I | C | G | A | G | V | V | K | G | F | Q | P | N | P | Y | Q | T | - | - | - | - |
| AtPIP1.3 | I | N | P | A | V | T | F | G | L | F | L | A | R | K | L | S | - | - | - | - | L | T | R | A | V | F | Y | M | I | M | Q | C | L | G | A | I | C | G | A | G | V | V | K | G | F | Q | P | T | P | Y | Q | T | - | - | - | - |
| AtPIP1.4 | I | N | P | A | V | T | F | G | L | F | L | A | R | K | L | S | - | - | - | - | L | T | R | A | V | F | Y | M | I | M | Q | C | L | G | A | I | C | G | A | G | V | V | K | G | F | Q | P | T | P | Y | Q | T | - | - | - | - |
| AtPIP1.5 | I | N | P | A | V | T | F | G | L | F | L | A | R | K | L | S | - | - | - | - | L | T | R | A | L | F | Y | I | V | M | Q | C | L | G | A | I | C | G | A | G | V | V | K | G | F | Q | P | G | L | Y | Q | T | - | - | - | - |
| ZmPIP1.1 | I | N | P | A | V | T | F | G | L | F | L | A | R | K | L | S | - | - | - | - | L | T | R | A | V | F | Y | I | I | M | Q | C | L | G | A | I | C | G | R | G | V | V | K | G | F | Q | Q | G | L | Y | M | G | - | - | - | - |
| ZmPIP1.2 | I | N | P | A | V | T | F | G | L | F | L | A | R | K | L | S | - | - | - | - | L | T | R | A | L | F | Y | I | I | M | Q | C | L | G | A | V | C | G | A | G | V | V | K | G | F | Q | Q | G | L | Y | M | G | - | - | - | - |
| ZmPIP1.3 | I | N | P | A | V | T | F | G | L | F | L | A | R | K | L | S | - | - | - | - | L | T | R | A | I | F | Y | I | I | M | Q | C | L | G | A | I | C | G | A | G | V | V | K | G | F | Q | Q | G | L | Y | M | G | - | - | - | - |
| ZmPIP1.4 | I | N | P | A | V | T | F | G | L | F | L | A | R | K | L | S | - | - | - | - | L | T | R | A | I | F | Y | I | I | M | Q | C | L | G | A | I | C | G | A | G | V | V | K | G | F | Q | Q | G | L | Y | M | G | - | - | - | - |
| ZmPIP1.5 | I | N | P | A | V | T | F | G | L | F | L | A | R | K | L | S | - | - | - | - | L | T | R | A | L | F | Y | M | V | M | Q | C | L | G | A | I | C | G | A | G | V | V | K | G | F | Q | E | G | L | Y | M | G | - | - | - | - |
| ZmPIP1.6 | I | N | P | A | V | T | F | G | L | L | L | A | R | K | L | S | - | - | - | - | L | T | R | A | V | Y | Y | V | V | M | Q | C | L | G | A | V | C | G | A | G | V | V | K | A | F | G | S | A | L | Y | E | S | - | - | - | - |
| PpPIP1.1 | I | N | P | A | V | T | F | G | L | F | L | A | R | K | V | S | - | - | - | - | L | N | R | A | L | F | Y | M | I | M | Q | C | L | G | A | M | C | G | A | E | I | V | K | G | F | Q | P | N | F | Y | Q | E | - | - | - | - |
| PpPIP1.2 | I | N | P | A | V | T | F | G | L | F | L | A | R | K | V | S | - | - | - | - | L | N | R | A | L | Y | Y | M | I | M | Q | C | L | G | A | M | A | G | A | G | I | V | K | G | F | Q | P | D | F | Y | Q | A | - | - | - | - |
| PpPIP1.3 | I | N | P | A | V | T | F | G | L | F | L | A | R | K | V | T | - | - | - | - | F | P | R | T | V | L | Y | I | V | C | Q | C | L | G | A | I | C | G | A | G | A | V | K | G | F | Q | P | D | F | Y | Q | S | - | - | - | - |
| AtPIP2.1 | I | N | P | A | V | T | F | G | L | F | L | A | R | K | V | S | - | - | - | - | L | P | R | A | L | L | Y | I | I | A | Q | C | L | G | A | I | C | G | V | G | F | V | K | A | F | Q | S | S | Y | Y | T | R | - | - | - | - |
| AtPIP2.2 | I | N | P | A | V | T | F | G | L | F | L | A | R | K | V | S | - | - | - | - | L | I | R | A | V | L | Y | M | V | A | Q | C | L | G | A | I | C | G | V | G | F | V | K | A | F | Q | S | S | Y | Y | D | R | - | - | - | - |
| AtPIP2.3 | I | N | P | A | V | T | F | G | L | F | L | A | R | K | V | S | - | - | - | - | L | I | R | A | V | L | Y | M | V | A | Q | C | L | G | A | I | C | G | V | G | F | V | K | A | F | Q | S | S | H | Y | V | N | - | - | - | - |
| AtPIP2.4 | I | N | P | A | V | T | V | G | L | F | L | A | R | K | V | S | - | - | - | - | L | V | R | T | V | L | Y | I | V | A | Q | C | L | G | A | I | C | G | C | G | F | V | K | A | F | Q | S | S | Y | Y | T | R | - | - | - | - |
| AtPIP2.5 | I | N | P | A | V | T | F | G | L | L | L | A | R | K | V | T | - | - | - | - | L | V | R | A | V | M | Y | M | V | A | Q | C | L | G | A | I | C | G | V | A | L | V | K | A | F | Q | S | A | Y | F | T | R | - | - | - | - |
| AtPIP2.6 | I | N | P | A | V | T | F | G | L | F | L | A | S | K | V | S | - | - | - | - | L | V | R | A | V | S | Y | M | V | A | Q | C | L | G | A | T | C | G | V | G | L | V | K | A | F | Q | S | T | Y | Y | N | T | - | - | - | - |
| AtPIP2.7 | I | N | P | A | V | T | F | G | L | F | L | A | R | K | V | S | - | - | - | - | L | V | R | A | L | S | Y | M | I | A | Q | C | L | G | A | I | C | G | V | G | L | V | K | A | F | M | M | T | P | Y | K | R | - | - | - | - |
| AtPIP2.8 | I | N | P | A | V | T | F | G | L | F | L | A | R | K | V | S | - | - | - | - | L | P | R | A | V | A | Y | M | V | A | Q | C | L | G | A | I | C | G | V | G | L | V | K | A | F | M | M | T | P | Y | K | R | - | - | - | - |
| ZmPIP2.1 | I | N | P | A | V | T | F | G | L | F | L | A | R | K | V | S | - | - | - | - | L | V | R | A | L | L | Y | I | V | A | Q | C | L | G | A | I | C | G | V | G | L | V | K | A | F | Q | S | A | Y | F | D | R | - | - | - | - |
| ZmPIP2.2 | I | N | P | A | V | T | F | G | L | F | L | A | R | K | V | S | - | - | - | - | L | V | R | A | L | L | Y | M | V | A | Q | C | L | G | A | V | C | G | V | G | L | V | K | A | F | Q | S | A | Y | F | D | R | - | - | - | - |
| ZmPIP2.3 | I | N | P | A | V | T | F | G | L | F | L | A | R | K | V | S | - | - | - | - | L | V | R | A | L | L | Y | I | I | A | Q | C | L | G | A | I | C | G | V | G | L | V | K | G | F | Q | S | A | Y | Y | V | R | - | - | - | - |
| ZmPIP2.4 | I | N | P | A | V | T | F | G | L | F | L | A | R | K | V | S | - | - | - | - | L | V | R | A | L | L | Y | I | I | A | Q | C | L | G | A | I | C | G | V | G | L | V | K | G | F | Q | S | A | Y | Y | V | R | - | - | - | - |
| ZmPIP2.5 | I | N | P | A | V | T | F | G | L | F | L | A | R | K | V | S | - | - | - | - | L | V | R | A | L | L | Y | I | V | A | Q | C | L | G | A | I | C | G | V | G | L | V | K | G | F | Q | S | A | F | Y | V | R | - | - | - | - |
| ZmPIP2.6 | I | N | P | A | V | T | F | G | L | F | L | A | R | K | V | S | - | - | - | - | L | V | R | A | L | L | Y | M | A | A | Q | S | L | G | A | I | C | G | V | A | L | V | K | G | F | Q | S | G | F | Y | A | R | - | - | - | - |
| ZmPIP2.7 | I | N | P | A | V | T | F | G | L | F | L | G | R | K | V | S | - | - | - | - | L | V | R | A | L | L | Y | M | I | A | Q | C | A | G | A | I | C | G | A | G | L | A | K | G | F | Q | K | S | F | Y | N | R | - | - | - | - |
| PpPIP2.1 | I | N | P | A | V | T | F | G | L | L | M | A | R | K | I | S | - | - | - | - | L | P | R | A | L | T | Y | M | I | A | Q | C | L | G | A | I | C | G | A | G | L | A | K | G | F | Q | T | A | F | Y | M | R | - | - | - | - |
| PpPIP2.2 | I | N | P | A | V | T | F | G | L | L | L | A | R | K | I | S | - | - | - | - | L | P | R | A | L | A | Y | M | I | A | Q | C | L | G | A | I | C | G | A | G | L | V | K | G | F | Q | T | A | F | Y | M | R | - | - | - | - |
| PpPIP2.3 | I | N | P | A | V | T | F | G | L | L | L | A | R | K | I | S | - | - | - | - | L | P | R | A | L | A | Y | M | I | A | Q | C | L | G | A | I | C | G | A | G | L | V | K | G | F | Q | T | A | F | Y | M | R | - | - | - | - |
| PpPIP2.4 | I | N | P | A | V | T | F | G | L | L | L | A | R | K | I | S | - | - | - | - | L | T | R | S | L | A | Y | M | V | A | Q | C | L | G | A | I | C | G | A | G | L | V | K | E | F | Q | H | S | F | Y | M | D | - | - | - | - |
| PpPIP3.1 | I | N | P | A | V | T | F | G | L | F | L | A | Q | Q | V | T | - | - | - | - | L | P | R | A | S | A | Y | I | V | A | Q | C | L | G | A | I | V | G | A | A | I | A | R | G | V | Q | E | G | G | E | Y | R | - | - | - | - |
| AtTIP1.1 | V | N | P | A | V | T | F | G | A | F | I | G | G | N | I | T | - | - | - | - | L | L | R | G | I | L | Y | W | I | A | Q | L | L | G | S | V | V | A | C | L | L | K | F | A | T | G | G | - | - | - | - | - |   |   |   |   |
| AtTIP1.2 | V | N | P | A | V | T | F | G | V | L | L | G | G | N | I | T | - | - | - | - | L | L | R | G | I | L | Y | W | I | A | Q | L | L | G | S | V | A | A | C | F | L | L | S | F | A | T | G | G | - | - | - | - | - |   |   |   |
| AtTIP1.3 | V | N | P | A | V | T | F | G | A | F | I | G | G | N | I | T | - | - | - | - | L | L | R | A | I | L | Y | W | I | A | Q | L | L | G | A | V | V | A | C | L | L | K | V | S | T | G | G | - | - | - | - | - |   |   |   |   |
| AtTIP2.1 | V | N | P | A | V | T | F | G | L | A | V | G | G | Q | I | T | - | - | - | - | V | I | T | G | V | F | Y | W | I | A | Q | L | L | G | S | T | A | A | C | F | L | L | K | Y | V | T | G | G | - | - | - | - | - |   |   |   |
| AtTIP2.2 | L | N | P | A | V | T | L | G | L | A | V | G | G | N | I | T | - | - | - | - | V | I | T | G | F | F | Y | W | I | A | Q | C | L | G | S | I | V | A | C | L | L | L | V | F | V | T | N | G | - | - | - | - | - |   |   |   |
| AtTIP2.3 | L | N | P | A | V | T | L | G | L | A | I | G | G | N | I | T | - | - | - | - | L | I | T | G | F | F | Y | W | I | A | Q | C | L | G | S | I | V | A | C | L | L | L | V | F | V | T | N | G | - | - | - | - | - |   |   |   |
| AtTIP3.1 | V | N | P | A | V | T | F | G | A | L | V | G | G | R | V | T | - | - | - | - | A | I | R | A | I | Y | Y | W | I | A | Q | L | L | G | A | I | L | A | C | L | L | L | R | L | T | T | N | G | - | - | - | - | - |   |   |   |
| AtTIP3.2 | V | N | P | A | V | T | F | A | A | L | I | G | G | R | I | S | - | - | - | - | V | I | R | A | I | Y | Y | W | V | A | Q | L |   |   |   |   |   |   |   |   |   |   |   |   |   |   |   |   |   |   |   |   |   |   |   |   |





|          |   |   |   |   |   |   |   |   |   |   |   |   |   |   |   |   |   |   |   |   |   |   |   |   |   |   |   |   |   |   |   |   |   |   |   |   |   |   |   |   |   |   |   |   |   |   |   |   |   |   |   |   |   |   |   |   |   |
|----------|---|---|---|---|---|---|---|---|---|---|---|---|---|---|---|---|---|---|---|---|---|---|---|---|---|---|---|---|---|---|---|---|---|---|---|---|---|---|---|---|---|---|---|---|---|---|---|---|---|---|---|---|---|---|---|---|---|
| AtPIP1.1 | G | A | N | T | V | A | H | - | - | - | G | Y | T | K | G | S | G | L | G | A | E | I | I | G | T | F | V | L | V | Y | T | V | F | S | - | - | A | T | D | A | K | R | N | A | - | - | - | - | - | R | D | S | H | V | P | I |   |
| AtPIP1.2 | G | A | N | T | I | A | H | - | - | - | G | Y | T | K | G | S | G | L | G | A | E | I | I | I | G | T | F | V | L | V | Y | T | V | F | S | - | - | A | T | D | A | K | R | N | A | - | - | - | - | - | R | D | S | H | V | P | I |
| AtPIP1.3 | G | A | N | T | V | A | H | - | - | - | G | Y | T | K | G | S | G | L | G | A | E | I | I | I | G | T | F | V | L | V | Y | T | V | F | S | - | - | A | T | D | A | K | R | S | A | - | - | - | - | - | R | D | S | H | V | P | I |
| AtPIP1.4 | G | A | N | T | V | A | H | - | - | - | G | Y | T | K | G | S | G | L | G | A | E | I | I | I | G | T | F | V | L | V | Y | T | V | F | S | - | - | A | T | D | A | K | R | S | A | - | - | - | - | - | R | D | S | H | V | P | I |
| AtPIP1.5 | G | A | N | V | V | A | H | - | - | - | G | Y | T | K | G | S | G | L | G | A | E | I | V | G | T | F | V | L | V | Y | T | V | F | S | - | - | A | T | D | A | K | R | S | A | - | - | - | - | - | R | D | S | H | V | P | I |   |
| ZmPIP1.1 | R | R | N | V | V | A | P | - | - | - | G | Y | T | K | G | D | G | L | G | A | E | I | V | G | T | F | I | L | V | Y | T | V | F | S | - | - | A | T | D | A | K | R | R | A | - | - | - | - | - | R | D | S | H | V | P | I |   |
| ZmPIP1.2 | G | A | N | V | V | A | P | - | - | - | G | Y | T | K | G | D | G | L | G | A | E | I | V | G | T | F | I | L | V | Y | T | V | F | S | - | - | A | T | D | A | K | R | N | A | - | - | - | - | - | R | D | S | H | V | P | I |   |
| ZmPIP1.3 | G | A | N | V | V | A | P | - | - | - | G | Y | T | K | G | D | G | L | G | A | E | I | V | G | T | F | I | L | V | Y | T | V | F | S | - | - | A | T | D | A | K | R | N | A | - | - | - | - | - | R | D | S | H | V | P | I |   |
| ZmPIP1.4 | G | A | N | V | V | A | P | - | - | - | G | Y | T | K | G | D | G | L | G | A | E | I | V | G | T | F | I | L | V | Y | T | V | F | S | - | - | A | T | D | A | K | R | N | A | - | - | - | - | - | R | D | S | H | V | P | I |   |
| ZmPIP1.5 | G | A | N | A | V | N | P | - | - | - | G | Y | T | K | G | D | G | L | G | A | E | I | V | G | T | F | V | L | V | Y | T | V | F | S | - | - | A | T | D | A | K | R | S | A | - | - | - | - | - | R | D | S | H | V | P | I |   |
| ZmPIP1.6 | G | A | N | A | V | S | P | - | - | - | G | Y | T | K | G | D | G | L | G | A | E | V | V | G | T | F | V | L | V | Y | T | V | F | S | - | - | A | T | D | A | K | R | T | A | - | - | - | - | - | R | D | S | H | V | P | A |   |
| PpPIP1.1 | G | S | N | S | V | A | H | - | - | - | G | Y | T | K | G | D | G | L | G | A | E | I | V | G | T | F | V | L | V | Y | T | V | F | S | - | - | A | T | D | A | K | R | N | A | - | - | - | - | - | R | D | S | H | V | P | V |   |
| PpPIP1.2 | G | A | N | A | V | N | H | - | - | - | G | Y | T | K | G | D | G | L | G | A | E | I | V | G | T | F | V | L | V | Y | T | V | F | S | - | - | A | T | D | A | K | R | S | A | - | - | - | - | - | R | D | S | H | V | P | V |   |
| PpPIP1.3 | G | A | N | T | V | A | H | - | - | - | G | Y | T | K | G | D | G | L | G | A | E | I | V | G | T | F | V | L | V | Y | T | V | F | S | - | - | A | T | D | A | K | R | N | A | - | - | - | - | - | R | D | S | H | V | P | L |   |
| AtPIP2.1 | G | A | N | S | L | A | D | - | - | - | G | Y | S | T | G | T | G | L | A | A | E | I | I | I | G | T | F | V | L | V | Y | T | V | F | S | - | - | A | T | D | P | K | R | S | A | - | - | - | - | - | R | D | S | H | V | P | V |
| AtPIP2.2 | G | A | N | S | L | A | D | - | - | - | G | Y | N | T | G | T | G | L | A | A | E | I | I | I | G | T | F | V | L | V | Y | T | V | F | S | - | - | A | T | D | P | K | R | N | A | - | - | - | - | - | R | D | S | H | V | P | V |
| AtPIP2.3 | G | A | N | F | L | A | D | - | - | - | G | Y | N | T | G | T | G | L | A | A | E | I | I | I | G | T | F | V | L | V | Y | T | V | F | S | - | - | A | T | D | P | K | R | N | A | - | - | - | - | - | R | D | S | H | V | P | V |
| AtPIP2.4 | G | A | N | E | L | A | D | - | - | - | G | Y | N | K | G | T | G | L | G | A | E | I | I | I | G | T | F | V | L | V | Y | T | V | F | S | - | - | A | T | D | P | K | R | N | A | - | - | - | - | - | R | D | S | H | V | P | V |
| AtPIP2.5 | G | A | N | G | L | S | D | - | - | - | G | Y | S | I | G | T | G | V | A | A | E | I | I | I | G | T | F | V | L | V | Y | T | V | F | S | - | - | A | T | D | P | K | R | S | A | - | - | - | - | - | R | D | S | H | V | P | V |
| AtPIP2.6 | G | A | N | M | L | S | D | - | - | - | G | Y | N | V | G | T | G | V | G | A | E | I | I | I | G | T | F | V | L | V | Y | T | V | F | S | - | - | A | T | D | P | K | R | N | A | - | - | - | - | - | R | D | S | H | I | P | V |
| AtPIP2.7 | G | A | N | T | V | A | D | - | - | - | G | Y | S | T | G | T | A | L | G | A | E | I | I | I | G | T | F | V | L | V | Y | T | V | F | S | - | - | A | T | D | P | K | R | S | A | - | - | - | - | - | R | D | S | H | I | P | V |
| AtPIP2.8 | G | A | N | T | V | A | D | - | - | - | G | Y | S | T | G | T | A | L | G | A | E | I | I | I | G | T | F | V | L | V | Y | T | V | F | S | - | - | A | T | D | P | K | R | S | A | - | - | - | - | - | R | D | S | H | I | P | V |
| ZmPIP2.1 | G | A | N | S | L | A | S | - | - | - | G | Y | S | R | G | T | G | L | G | A | E | I | I | I | G | T | F | V | L | V | Y | T | V | F | S | - | - | A | T | D | P | K | R | N | A | - | - | - | - | - | R | D | S | H | V | P | V |
| ZmPIP2.2 | G | A | N | S | L | A | S | - | - | - | G | Y | S | R | G | A | G | L | G | A | E | I | V | G | T | F | V | L | V | Y | T | V | F | S | - | - | A | T | D | P | K | R | N | A | - | - | - | - | - | R | D | S | H | V | P | V |   |
| ZmPIP2.3 | G | A | N | E | L | S | D | - | - | - | G | Y | S | K | G | T | G | L | A | A | E | I | I | I | G | T | F | V | L | V | Y | T | V | F | S | - | - | A | T | D | P | K | R | S | A | - | - | - | - | - | R | D | S | H | V | P | V |
| ZmPIP2.4 | G | A | N | E | L | S | D | - | - | - | G | Y | S | K | G | T | G | L | A | A | E | I | I | I | G | T | F | V | L | V | Y | T | V | F | S | - | - | A | T | D | P | K | R | S | A | - | - | - | - | - | R | D | S | H | V | P | V |
| ZmPIP2.5 | G | A | N | E | L | S | A | - | - | - | G | Y | S | K | G | T | G | L | A | A | E | I | I | I | G | T | F | V | L | V | Y | T | V | F | S | - | - | A | T | D | P | K | R | N | A | - | - | - | - | - | R | D | S | H | V | P | V |
| ZmPIP2.6 | G | A | N | E | V | S | A | - | - | - | G | Y | S | T | G | T | G | L | A | A | E | I | I | I | G | T | F | V | L | V | Y | T | V | F | S | - | - | A | T | D | P | K | R | N | A | - | - | - | - | - | R | D | S | H | V | P | V |
| ZmPIP2.7 | G | V | N | T | V | S | D | - | - | - | G | Y | N | K | G | T | A | L | G | A | E | I | I | I | G | T | F | V | L | V | Y | T | V | F | S | - | - | A | T | D | P | K | R | N | A | - | - | - | - | - | R | D | S | H | V | P | V |
| PpPIP2.1 | G | A | N | S | V | A | L | - | - | - | G | Y | S | T | G | T | G | L | A | A | E | I | I | I | G | T | F | V | L | V | Y | T | V | F | S | - | - | A | T | D | P | K | R | N | A | - | - | - | - | - | R | D | S | H | V | P | V |
| PpPIP2.2 | G | A | N | S | V | A | A | - | - | - | G | Y | S | I | G | T | G | L | A | A | E | I | I | I | G | T | F | V | L | V | Y | T | V | F | S | - | - | A | T | D | P | K | R | N | A | - | - | - | - | - | R | D | S | H | V | P | V |
| PpPIP2.3 | G | A | N | A | V | N | A | - | - | - | G | Y | S | T | G | T | G | L | A | A | E | I | I | I | G | T | F | V | L | V | Y | T | V | F | S | - | - | A | T | D | P | K | R | N | A | - | - | - | - | - | R | D | S | H | V | P | V |
| PpPIP2.4 | G | A | N | A | V | A | P | - | - | - | G | Y | S | I | G | T | G | L | A | A | E | I | I | I | G | T | F | V | L | V | Y | T | V | F | S | - | - | A | T | D | P | K | R | N | A | - | - | - | - | - | R | D | S | H | V | P | V |
| PpPIP3.1 | A | V | N | G | V | Q | P | - | - | - | G | Y | N | I | G | Q | A | L | A | A | E | I | M | G | T | F | V | L | L | Y | T | V | L | S | - | - | A | T | D | P | T | R | K | A | - | - | - | - | - | R | D | S | H | V | P | V |   |
| AtTIP1.1 | P | A | F | G | L | S | A | - | - | - | G | V | G | V | L | N | A | F | V | F | E | I | V | M | T | F | G | L | V | Y | T | V | Y | A | - | T | A | I | D | P | K | N | - | - | - | - | - | - | G | S | L | G | T |   |   |   |   |
| AtTIP1.2 | P | A | F | G | L | S | A | - | - | - | G | V | G | S | L | N | A | L | V | F | E | I | V | M | T | F | G | L | V | Y | T | V | Y | A | - | T | A | V | D | P | K | N | - | - | - | - | - | - | - | G | S | L | G | T |   |   |   |
| AtTIP1.3 | A | A | F | S | L | S | Y | - | - | - | G | V | T | P | W | N | A | V | V | F | E | I | V | M | T | F | G | L | V | Y | T | V | Y | A | - | T | A | V | D | P | K | K | - | - | - | - | - | - | - | G | D | I | G | I |   |   |   |
| AtTIP2.1 | P | T | H | S | V | A | A | - | - | - | G | L | G | S | I | E | G | V | V | M | E | I | I | I | T | F | A | L | V | Y | T | V | Y | A | - | T | A | A | D | P | K | K | - | - | - | - | - | - | - | G | S | L | G | T |   |   |   |
| AtTIP2.2 | P | T | H | G | V | A | A | - | - | - | G | L | G | A | I | E | G | V | V | M | E | I | V | V | T | F | A | L | V | Y | T | V | Y | A | - | T | A | A | D | P | K | K | - | - | - | - | - | - | - | - | G | S | L | G | T |   |   |
| AtTIP2.3 | P | T | H | G | V | S | A | - | - | - | G | L | G | A | V | E | G | V | V | M | E | I | V | V | T | F | A | L | V | Y | T | V | Y | A | - | T | A | A | D | P | K | K | - | - | - | - | - | - | - | - | G | S | L | G | T |   |   |
| AtTIP3.1 | V | G | F | R | L | A | S | - | - | - | G | V | G | A | V | N | G | L | V | L | E | I | I | I | L | T | F | G | L | V | Y | V | V | Y | S | - | T | L | I | D | P | K | R | - | - | - | - | - | - | - | G | S | L | G | I |   |   |
| AtTIP3.2 | V | G | F | H | V | A | S | - | - | - | G | V | S | E | L | H | G | L | L | M |   |   |   |   |   |   |   |   |   |   |   |   |   |   |   |   |   |   |   |   |   |   |   |   |   |   |   |   |   |   |   |   |   |   |   |   |   |











|          |   |   |
|----------|---|---|
| AtPIP1.1 | - | - |
| AtPIP1.2 | - | - |
| AtPIP1.3 | - | - |
| AtPIP1.4 | - | - |
| AtPIP1.5 | - | - |
| ZmPIP1.1 | - | - |
| ZmPIP1.2 | - | - |
| ZmPIP1.3 | - | - |
| ZmPIP1.4 | - | - |
| ZmPIP1.5 | - | - |
| ZmPIP1.6 | - | - |
| PpPIP1.1 | - | - |
| PpPIP1.2 | - | - |
| PpPIP1.3 | - | - |
| AtPIP2.1 | - | - |
| AtPIP2.2 | - | - |
| AtPIP2.3 | - | - |
| AtPIP2.4 | - | - |
| AtPIP2.5 | - | - |
| AtPIP2.6 | - | - |
| AtPIP2.7 | - | - |
| AtPIP2.8 | - | - |
| ZmPIP2.1 | - | - |
| ZmPIP2.2 | - | - |
| ZmPIP2.3 | - | - |
| ZmPIP2.4 | - | - |
| ZmPIP2.5 | - | - |
| ZmPIP2.6 | - | - |
| ZmPIP2.7 | - | - |
| PpPIP2.1 | - | - |
| PpPIP2.2 | - | - |
| PpPIP2.3 | - | - |
| PpPIP2.4 | - | - |
| PpPIP3.1 | - | - |
| AtTIP1.1 | - | - |
| AtTIP1.2 | - | - |
| AtTIP1.3 | - | - |
| AtTIP2.1 | - | - |
| AtTIP2.2 | - | - |
| AtTIP2.3 | - | - |
| AtTIP3.1 | - | - |
| AtTIP3.2 | - | - |
| AtTIP4.1 | - | - |
| AtTIP5.1 | - | - |
| ZmTIP1.1 | - | - |
| ZmTIP1.2 | - | - |
| ZmTIP2.1 | - | - |
| ZmTIP2.2 | - | - |
| ZmTIP2.3 | - | - |
| ZmTIP3.1 | - | - |
| ZmTIP3.2 | - | - |
| ZmTIP4.1 | - | - |
| ZmTIP4.2 | - | - |
| ZmTIP4.3 | - | - |
| ZmTIP4.4 | - | - |
| ZmTIP5.1 | - | - |
| PpTIP6.1 | - | - |
| PpTIP6.2 | - | - |
| PpTIP6.3 | - | - |
| PpTIP6.4 | - | - |
| AtNIP1.1 | - | - |
| AtNIP1.2 | - | - |
| AtNIP2.1 | - | - |
| AtNIP3.1 | - | - |
| AtNIP4.1 | - | - |
| AtNIP4.2 | - | - |
| AtNIP5.1 | - | - |
| AtNIP6.1 | - | - |
| AtNIP7.1 | - | - |
| ZmNIP1.1 | - | - |
| ZmNIP2.1 | - | - |
| ZmNIP2.2 | - | - |
| ZmNIP2.3 | - | - |
| ZmNIP3.1 | - | - |
| PpNIP5.1 | - | - |
| PpNIP5.2 | - | - |
| PpNIP5.3 | - | - |
| PpNIP3.1 | - | - |
| PpNIP6.1 | - | - |
| AtSIP1.2 | - | - |
| AtSIP1.1 | - | - |
| AtSIP2.1 | - | - |
| ZmSIP1.1 | - | - |
| ZmSIP1.2 | - | - |
| ZmSIP2.1 | - | - |
| PpSIP1.1 | - | - |
| PpSIP1.2 | - | - |
| PpGIP1.1 | - | - |
| PpHIP1.1 | - | - |
| PpXIP1.1 | - | - |
| PpXIP1.2 | - | - |
